# Supplementary material
Source: bioRxiv or medRxiv preprint supplement (https://www.biorxiv.org/highwire/filestream/125689/field_highwire_adjunct_files/6/416701-6.pdf)
Supplement: Supplementary file [file 416701-6.pdf]

| # | Process                                        | Equation                                                                           |
|---|------------------------------------------------|------------------------------------------------------------------------------------|
|   | <b>Heterotrophs</b>                            |                                                                                    |
| 0 | Aerobic growth                                 | $\mu_{Hmax} \cdot \frac{S_O}{K_{OH} + S_O} \cdot \frac{S_C}{K_C + S_C} \cdot X_H$  |
| 1 | Aerobic endogenous respiration                 | $b_H \cdot \frac{S_O}{K_{OH} + S_O} \cdot X_H$                                     |
|   | <b>AOB</b>                                     |                                                                                    |
| 2 | Aerobic growth                                 | $\mu_{Amax} \cdot \frac{S_O}{K_{O_A} + S_O} \cdot \frac{S_A}{K_A + S_A} \cdot X_A$ |
| 3 | Aerobic endogenous respiration                 | $b_A \cdot \frac{S_O}{K_{O_A} + S_O} \cdot X_A$                                    |
|   | <b>NOB</b>                                     |                                                                                    |
| 4 | Aerobic growth on NO <sub>2</sub> <sup>-</sup> | $\mu_{Nmax} \cdot \frac{S_O}{K_{ON} + S_O} \cdot \frac{S_N}{K_N + S_N} \cdot X_N$  |
| 5 | Aerobic endogenous respiration                 | $b_N \cdot \frac{S_O}{K_{ON} + S_O} \cdot X_N$                                     |
